# Supplementary material for: Estimating downwelling solar irradiance at the surface of the tropical Atlantic Ocean: A comparison of PIRATA measurements against several re-analyses and satellite-derived data sets
Source: Copernicus journal article supplement (doi:10.5194/os-2017-95), 2017-12-18
Supplement: Supplementary file [file os-2017-95-RC2-supplement.zip]

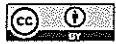

- Koster, R. (editor): Technical Report Series on Global Modeling and Data Assimilation, Volume 43, National Aeronautics and Space Administration (NASA), 139 p., 2015.
- Lean, J., and Rind, D.: Climate forcing by changing solar radiation, *J Climate*, 11, 3069–3094, doi: 10.1175/1520-0442(1998)011<3069:CFBCSR>2.0.CO;2, 1998.
- 5 Lefèvre, M., and Wald, L.: Validation of the McClear clear-sky model in desert conditions with three stations in Israel, *Adv Sci Res*, 13, 21–26, doi:10.5194/asr-13-21-2016, 2016.
- Lefèvre, M., Diabaté, L., and Wald, L.: Using reduced data sets ISCCP-B2 from the Meteosat satellites to assess surface solar irradiance, *Sol Energy*, 81, 240–253, doi:10.1016/j.solener.2006.03.008, 2007.
- Lefèvre, M., Oumbe, A., Blanc, P., Espinar, B., Gschwind, B., Qu, Z., Wald, L., Schroedter-Homscheidt, M., Hoyer-Klick, C., Arola, A., Benedetti, A., Kaiser, J. W., and Morcrette, J.-J.: McClear: a new model estimating downwelling solar radiation at ground level in clear-sky condition, *Atmos Meas Tech*, 6, 2403–2418, doi: 10.5194/amt-6-2403-2013, 2013.
- 10 Lefèvre, M., Blanc, P., Espinar, B., Gschwind, B., Ménard, L., Ranchin, T., Wald, L., Saboret, L., Thomas, C., and Wey, E.: The HelioClim-1 database of daily solar radiation at Earth surface: an example of the benefits of GEOSS Data-CORE, *IEEE JSTARS*, 7, 1745–1753, doi:10.1109/JSTARS.2013.2283791, 2014.
- 15 Liu, C., Allan, R. P., Mayer, M., Hyder, P., Loeb, N. G., Roberts, C. D., Valdivieso, M., Edwards, J. M., and Vidale, P.-L.: Evaluation of satellite and reanalysis based global net surface energy flux and uncertainty estimates, *J Geophys Res Atmos*, 122, doi:10.1002/2017JD026616, 2017.
- Long, C. N., Bucholtz, A., Jonsson, H., Schmid, B., Vogelmann, A., and Wood, J.: A method of correcting for tilt from horizontal in downwelling shortwave irradiance measurements on moving platforms, *The Open Atmospheric Science*
- 20 *Journal*, 4, 78–87, doi: 10.2174/1874282301004010078, 2010.
- MacWhorter, M. A., and Weller, R. A.: Error in measurements of incoming shortwave radiation made from ships and buoys, *J Atmos Ocean Tech*, 8, 108–117, doi: 10.1175/1520-0426(1991)008<0108:EIMOIS>2.0.CO;2, 1991.
- Manabe, S.: Climate and the ocean circulation, *Mon Wea Rev*, 97, 739–774, doi:10.1175/1520-0493(1969)097<0739:CATOC>2.3.CO;2, 1969.
- 25 Marchand, M., Al-Azri, N., Ombe-Ndeffotsing, A., Wey, E., and Wald, L.: Evaluating meso-scale change in performance of several databases of hourly surface irradiation in South-eastern Arabic Peninsula, *Adv Sci Res*, 14, 7–15, doi:10.5194/asr-14-7-2017, 2017.
- Müller, R., Pfeifroth, U., Traeger-Chatterjee, C., Trentmann, J. and Cremer, R.: Digging the METEOSAT treasure-3 decades of solar surface radiation, *Remote Sens-Basel*, 7, 8067–8101, doi:10.3390/rs70608067, 2015.
- 30 Muneer, T., and Fairouz, F.: Quality control of solar radiation and sunshine measurements - lessons learnt from processing worldwide databases, *Build Serv Eng Res T*, 23, 151–166, doi: 10.1191/0143624402bt038oa, 2002.
- Pfeifroth, U., Kothe, S., Müller, R., Trentmann, J., Hollmann, R., Fuchs, P., and Werscheck M.: Surface Radiation Data Set - Heliosat (SARAH) - Edition 2. Satellite Application Facility on Climate Monitoring. doi: 10.5676/EUM\_SAF\_CM/SARAH/V002, 2017a.

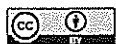

Pfeifroth, U., Sanchez-Lorenzo, A., Manara, V., Trentmann, J., and Hollmann, R.: Trends and variability of surface solar radiation in Europe based on surface- and satellite-based data records, *J Geophys Res*, under review, 2017b.

Qu, Z., Gschwind, B., Lefèvre, M., and Wald, L.: Improving HelioClim-3 estimates of surface solar irradiance using the McClear clear-sky model and recent advances in atmosphere composition, *Atmos Meas Tech*, 7, 3927–3933, doi:10.5194/amt-73927-2014, 2014.

Qu, Z., Oumbe, A., Blanc, P., Espinar, B., Gesell, G., Gschwind, B., Klüser, L., Lefèvre, M., Saboret, L., Schroedter-Homscheidt, M., and Wald L.: Fast radiative transfer parameterisation for assessing the surface solar irradiance: The Heliosat-4 method, *Meteorologische Zeitschrift*, 26, 33–57, doi:10.1127/metz/2016/0781, 2017.

Reynolds, R. M.: Correcting global shortwave irradiance measurements for platform tilt, Internal Report, RMR Company, available at [www.rmrco.com/docs/m0703\\_psp\\_lowlevel\\_correction.pdf](http://www.rmrco.com/docs/m0703_psp_lowlevel_correction.pdf), last accessed: 2017-07-28.

Rienecker, M. M., Suarez, M. J., Gelaro, R., Todling, R., Bacmeister, J., Liu, E., Bosilovich, M. G., Schubert, S. D., Takacs, L., Kim, G.-K., Bloom, S., Chen, J., Collins, D., Conaty, A., da Silva, A., Gu, W., Joiner, J., Koster, R. D., Lucchesi, R., Molod, A., Owens, T., Pawson, S., Pegion, P., Redder, C. R., Reichle, R., Robertson, F. R., Ruddick, A. G., Sienkiewicz, M., and Woollen, J.: MERRA: NASA's modern-era retrospective analysis for research and applications, *J Climate*, 24, 3624–3648, doi:10.1175/JCLI-D-11-00015.1, 2011.

Rigollier, C., Lefèvre, M., and Wald, L.: The method Heliosat-2 for deriving shortwave solar radiation from satellite images, *Sol Energy*, 77, 159–169, doi 10.1016/j.solener.2004.04.017, 2004.

Siegel, D. A., Ohlmann, J. C., Washburn, L., Bidigare, R. R., Nosse, C. T., Fields, E., and Zhou, Y.: Solar radiation, phytoplankton pigments and the radiant heating of the equatorial Pacific warm pool, *J Geophys Res*, 100(C3), 4885–4891, doi:10.1029/94JC03128, 1995.

Thomas, C., Wey, E., Blanc, P., and Wald, L.: Validation of three satellite-derived databases of surface solar radiation using measurements performed at 42 stations in Brazil, *Adv Sci Res*, 13, 81–86, doi:10.5194/asr-13-81-2016, 2016a.

Thomas, C., Wey, E., Blanc, P., Wald, L., and Lefèvre, M.: Validation of HelioClim-3 version 4, HelioClim-3 version 5 and MACC-RAD using 14 BSRN stations, *Energy Procedia*, 91, 1059–1069, doi: 10.1016/j.egypro.2016.06.275, 2016b.

Urraca, R., Gracia-Amillo, A. M., Huld, T., Martinez-de-Pison, F. J., Trentmann, J., Lindfors, A. V., Riihelä, A., and Sanz-Garcia, A.: Quality control of global solar radiation data with satellite-based products, *Solar Energy*, 158, 49–62, doi: 10.1016/j.solener.2017.09.032, 2017.

Wald L.: Solar radiation energy (fundamentals). In *Solar Energy Conversion and Photoenergy Systems*, edited by Julian Blanco and Sixto Malato, in *Encyclopedia of Life Support Systems (EOLSS)*, Developed under the Auspices of the UNESCO, Eolss Publishers, Oxford ,UK, [<http://www.eolss.net>], 2007.

Wild, M.: Short-wave and long-wave surface radiation budgets in GCMs: a review based on the IPCC-AR4/CMIP3 models, *Tellus*, 60A, 932–945, doi: 10.1111/j.1600-0870.2008.00342.x, 2008.

WMO: Guide to meteorological instruments and methods of observation, WMO-No 8, 2008 edition updated in 2010, World Meteorological Organization, Geneva, Switzerland, 2012.

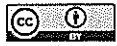

Yi, Y., Kimball, J.S., Jones, L.A., Reichle, R.H., and McDonald, K.C.: Evaluation of MERRA land surface estimates in preparation for the soil moisture active passive mission, *J Climate*, 24, 3797–3816, doi: 10.1175/2011JCLI4034.1, 2011.

Zib, B. J., Dong, X., Xi, B., and Kennedy, A.: Evaluation and intercomparison of cloud fraction and radiative fluxes in recent reanalyses over the Arctic using BSRN surface observations, *J Climate*, 25, 2291–2305, doi: 10.1175/JCLI-D-11-00147.1,

5 2012.

Zhao, L., Lee, X., and Liu, S.: Correcting surface solar radiation of two data assimilation systems against FLUXNET observations in North America, *J Geophys Res Atmos*, 118, 9552–9564, doi:10.1002/jgrd.50697, 2013.

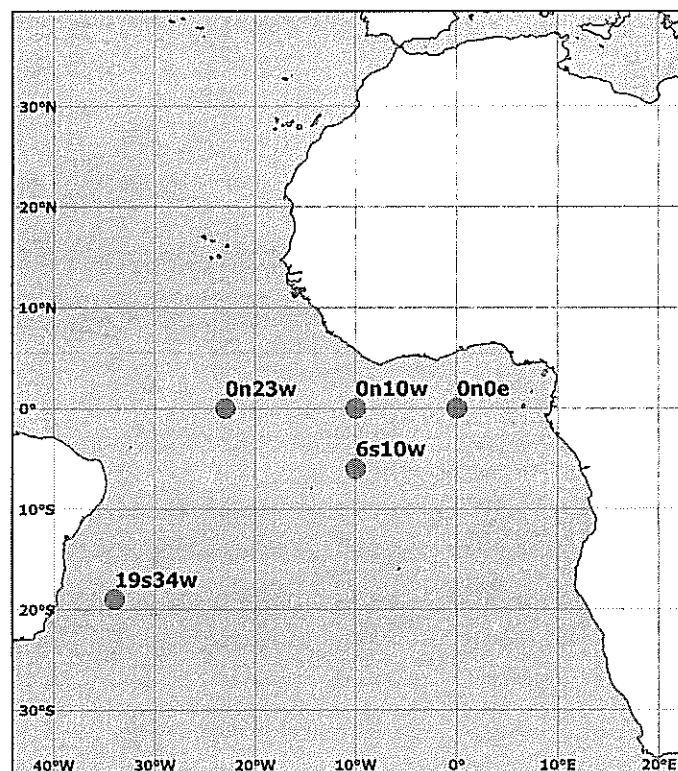

10 Figure 1: Map showing the location of the five PIRATA buoys used in this study.

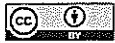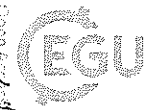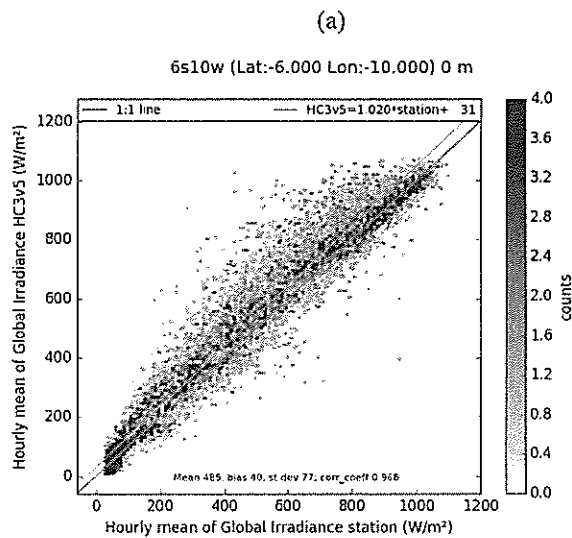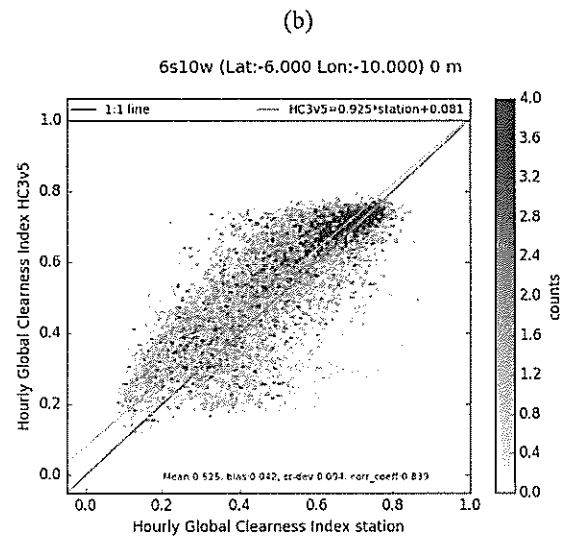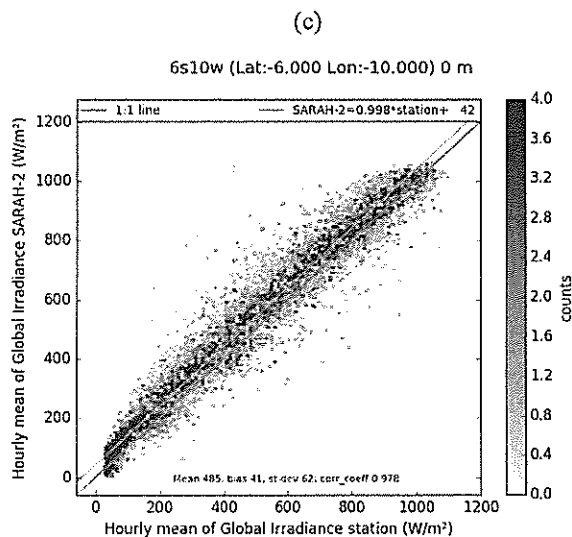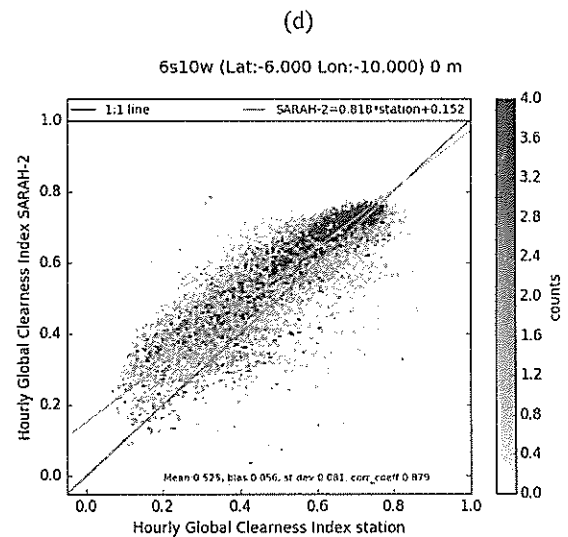

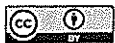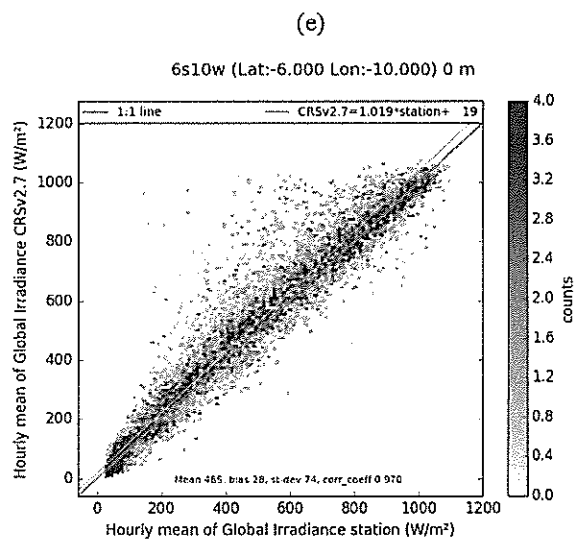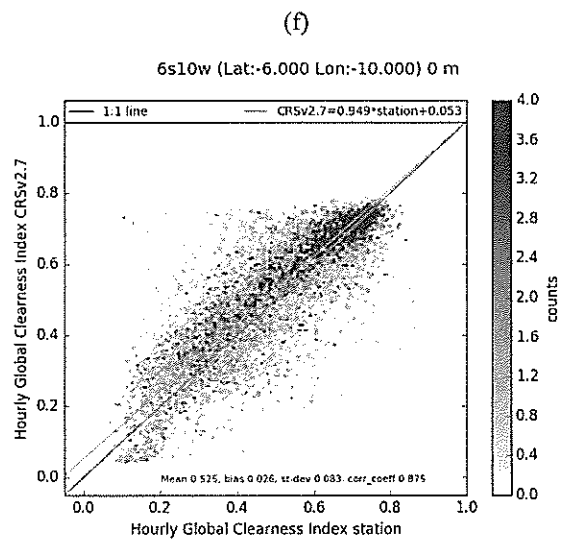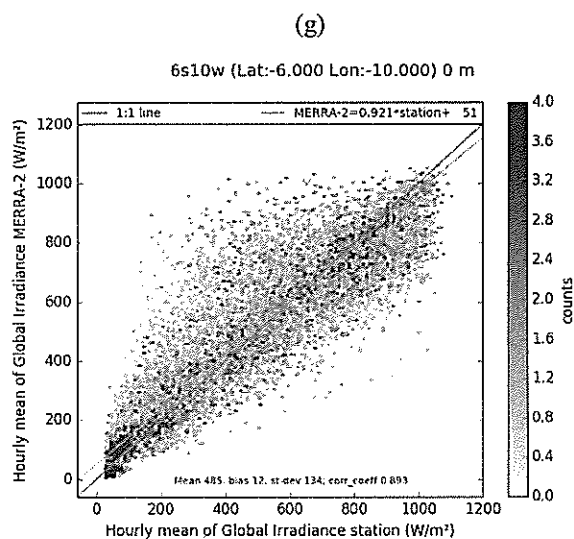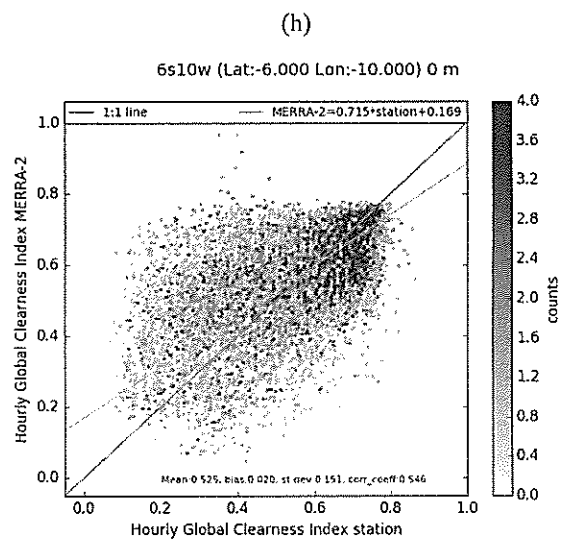

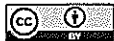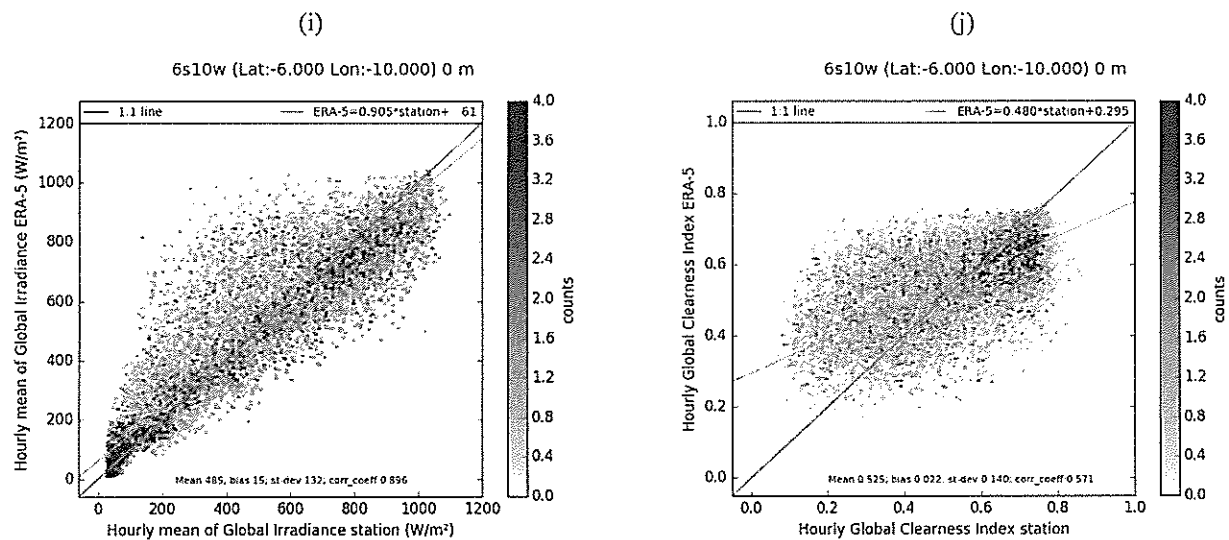

Figure 2: 2D histogram of PIRATA measurements (horizontal axis) and data sets (vertical axis) for the station 6s10w for E (left) and KT (right). HC3v5: (a), (b); SARAH 2: (c), (d); CRS: (e), (f); MERRA-2: (g), (h); ERA-5: (i), (j). Ideally, the dots should lie along the red line (1:1 line). The blue line is the affine function fitted over the points and should overlay the red line.

5

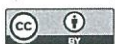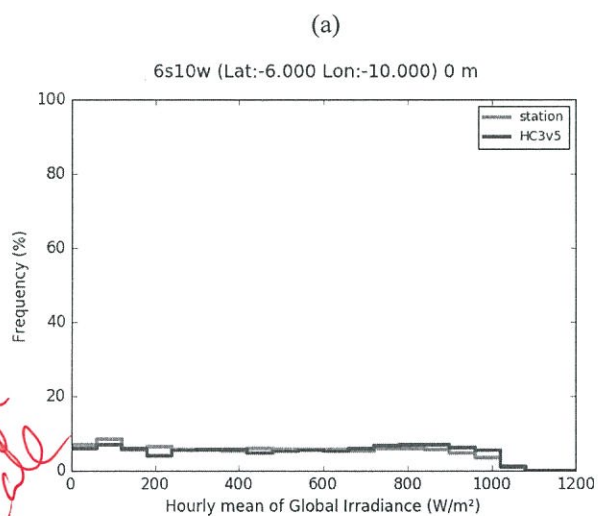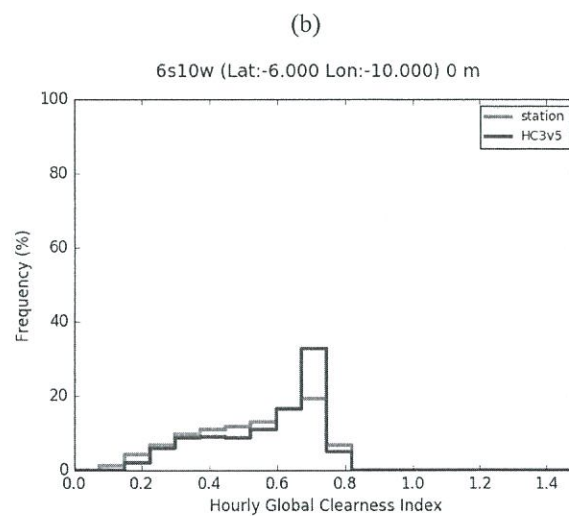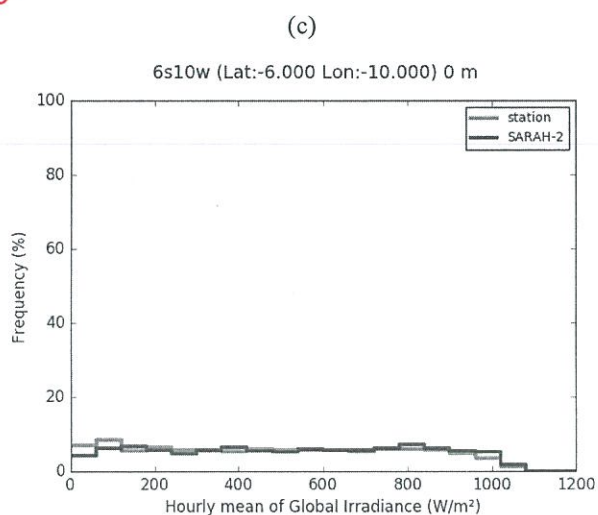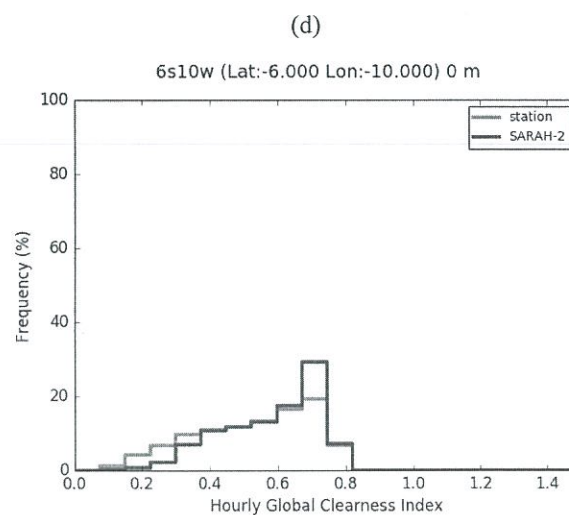

Too digitised  
→ use smaller  $\Delta$

Put dataset in  
Caption &  
otherwise  
confusing.

captions  
seem wrong oh  
- are they  
all same  
buoy?

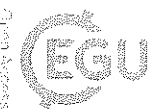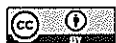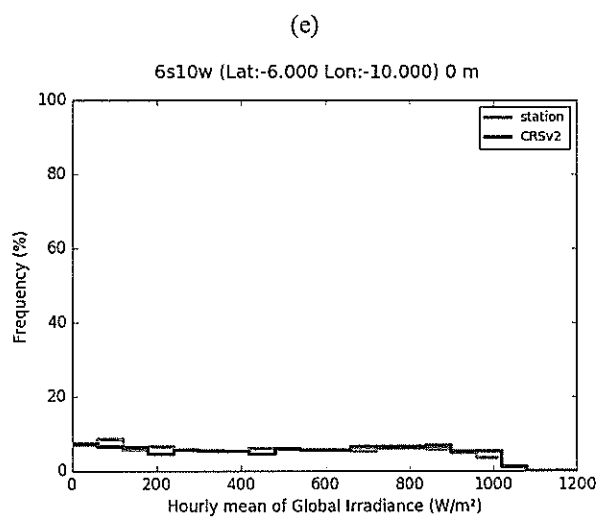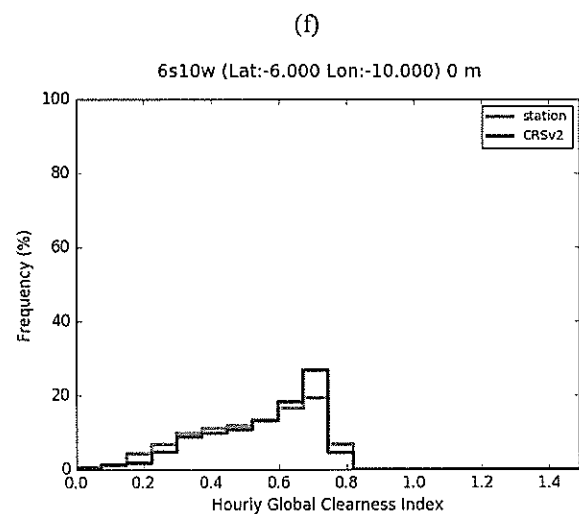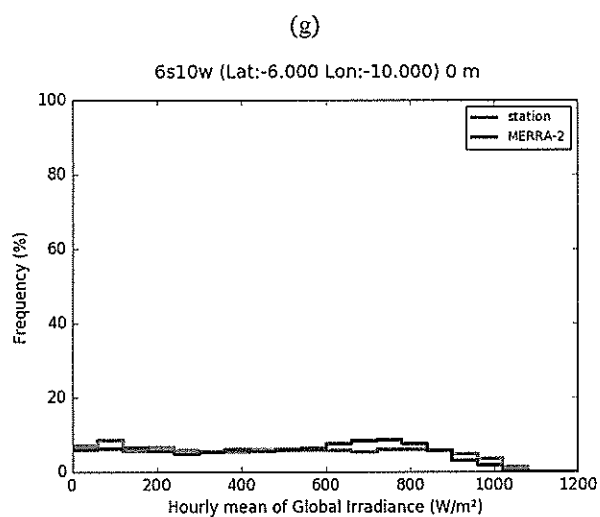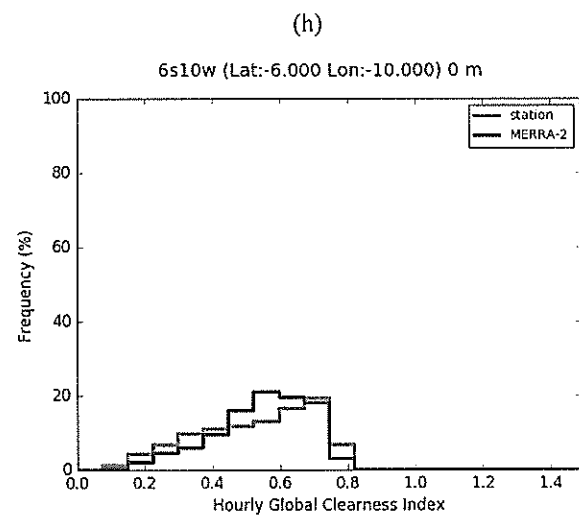



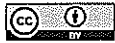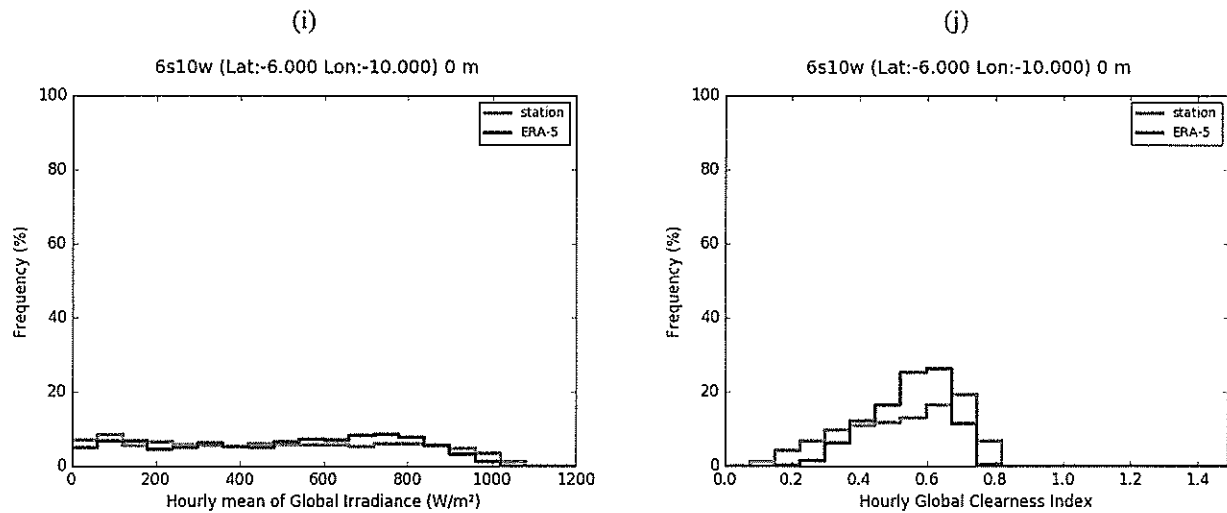

Figure 3: Frequency distributions of PIRATA measurements (red) and data sets (blue) for the station 6s10w for E (left) and KT (right). HC3v5: (a), (b); SARAH 2: (c), (d); CRS: (e), (f); MERRA-2: (g), (h); ERA-5: (i), (j). If the blue line is above, respectively below, the red one for a given sub-range of values, it means that the data set produces these values too frequently, respectively too rarely with respect to the PIRATA measurements.

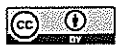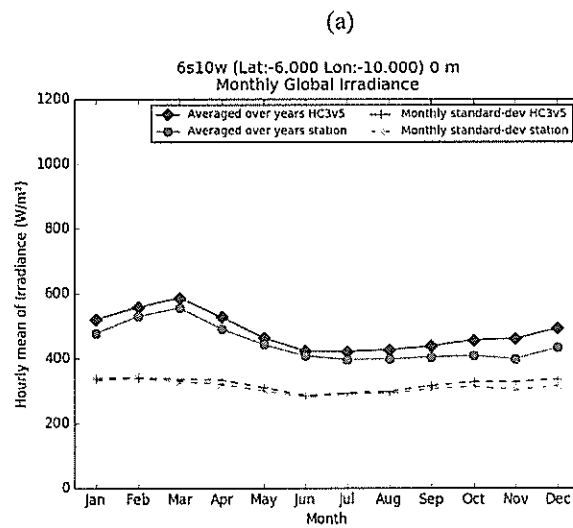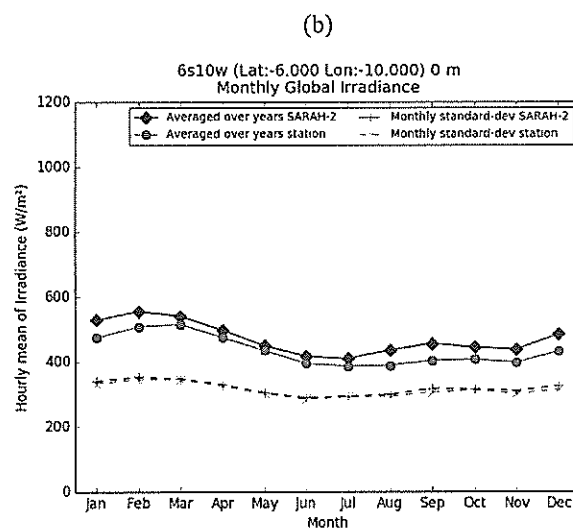

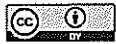

(c)

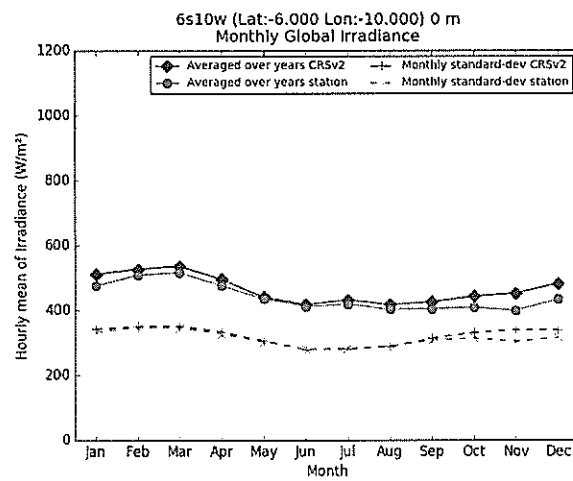

(d)

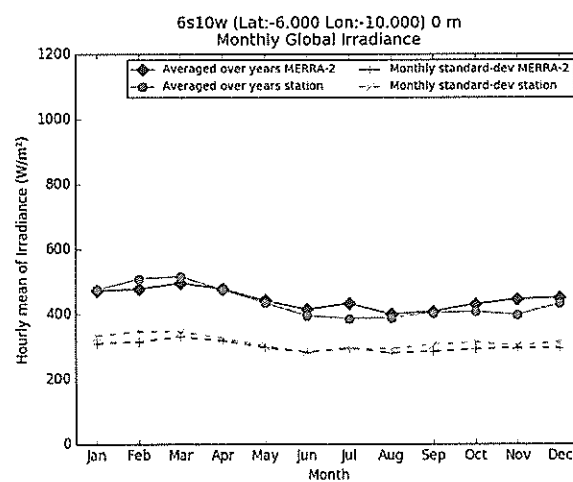

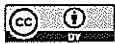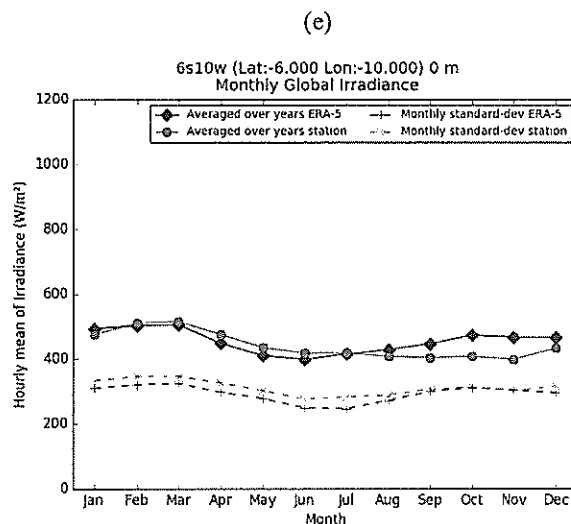

Figure 4: Monthly means (dots) and standard deviations (crosses) of hourly DSIS, in  $W m^{-2}$ , from PIRATA measurements (red) and data sets (blue) for the station 6s10w. HC3v5: (a); SARAH 2: (b); CRS: (c); MERRA-2: (d); ERA-5: (e). A difference between red dot (measurements) and blue diamond (data set) for a given month denotes a systematic error for this month: underestimation if the blue diamond is below the red dot, overestimation otherwise. For a given month, a blue cross above the red one means that the data set produces too much variability for this month; in the opposite case, the data set does not contain enough variability.

5

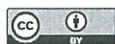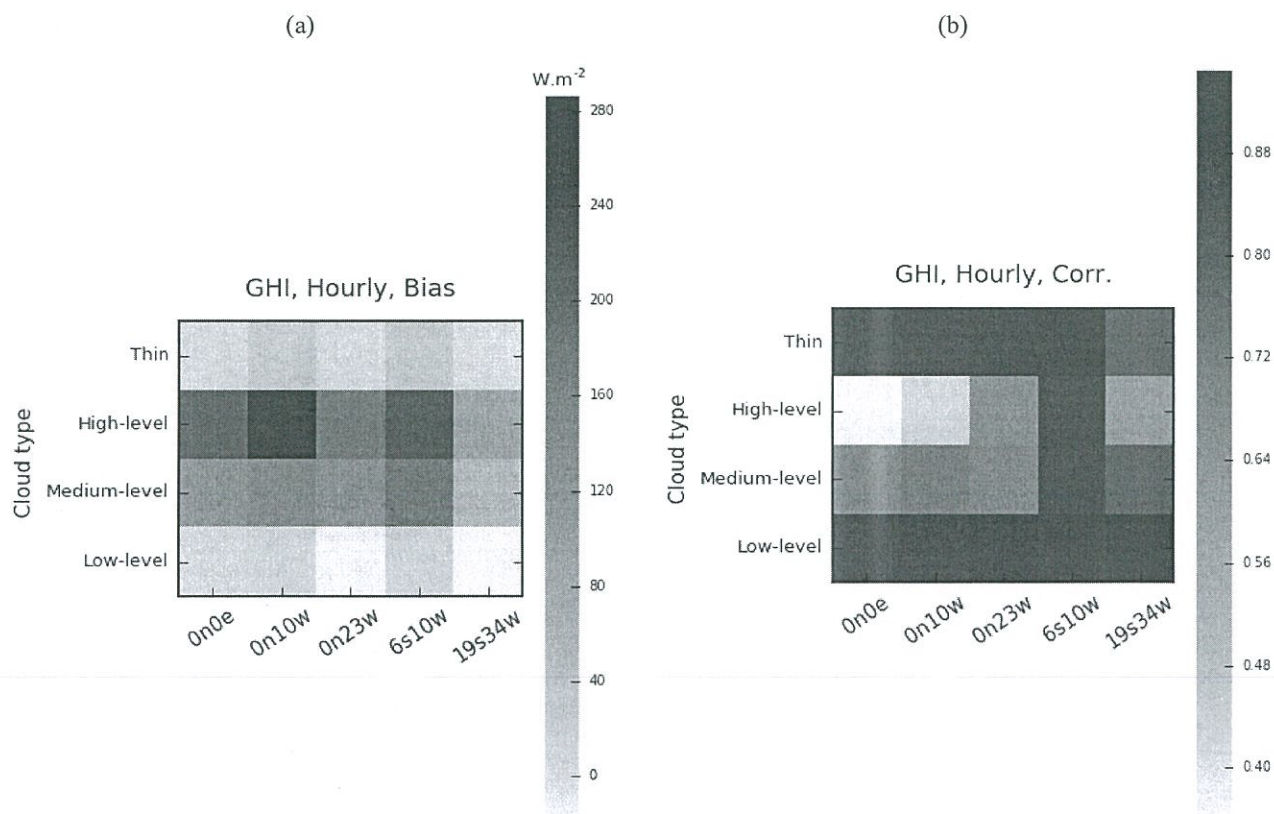

↑ make plot  
 & error bar  
 Same height

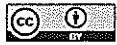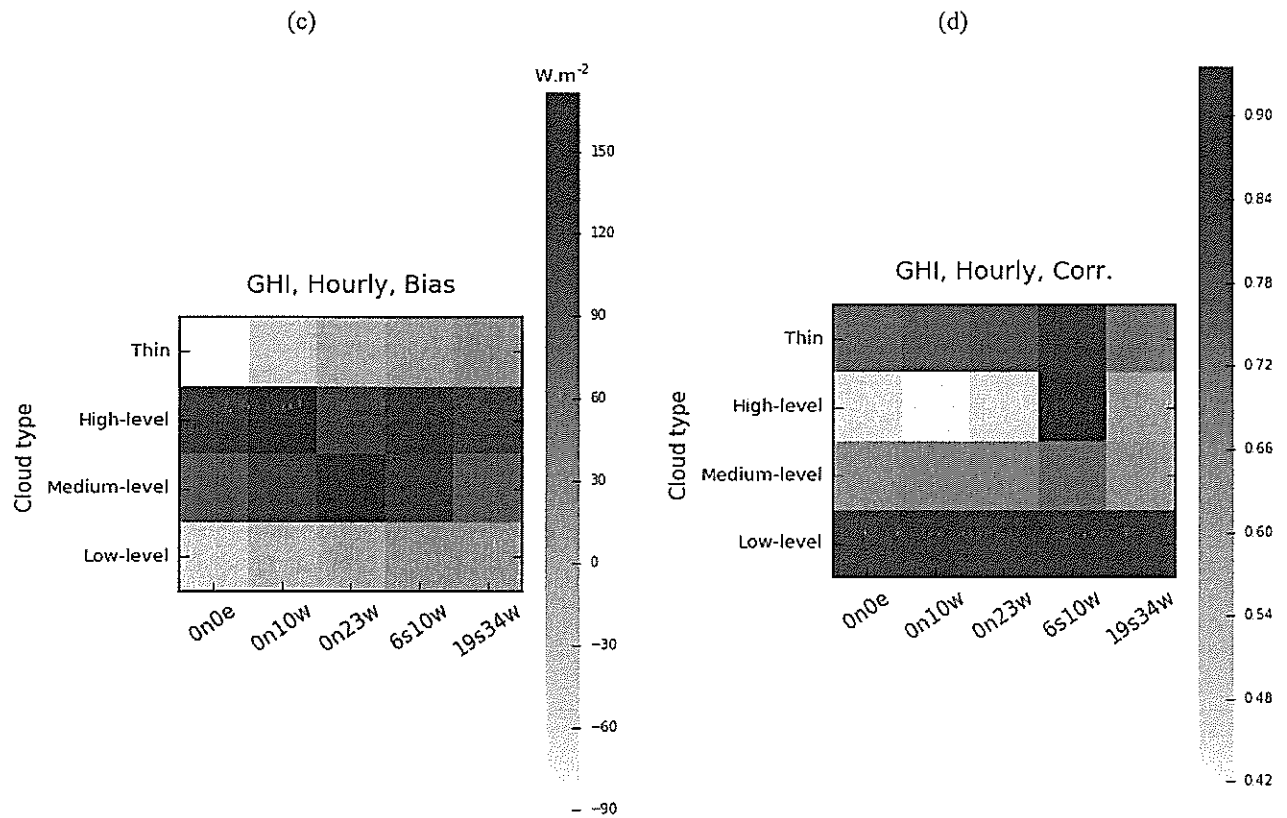

Figure 5: Bias (left, in  $W.m^{-2}$ ) and correlation coefficient (right) as a function of the cloud type for each PIRATA station. ERA-5: (a), (b); MERRA-2: (c), (d). A plot should be uniformly colored in case of no dependency.
